# Supplementary material
Source: publisher figshare collection journal article supplement (https://gsapubs.figshare.com/ndownloader/files/22741817)
Supplement: Supplementary file 1 [file 22741817]

TABLE A. PETROGRAPHIC DESCRIPTIONS AND ADDITIONAL CHEMICAL DATA OF

| sample # | lithology                       | $^{87}\text{Sr}/^{86}\text{Sr}$ | carbonate occurrences                                                                         | carbonate analyzed             | diagenetic carbonate mineralogy | mol % MgO |
|----------|---------------------------------|---------------------------------|-----------------------------------------------------------------------------------------------|--------------------------------|---------------------------------|-----------|
| 2275-4   | layered sandstone and siltstone | 0.712207                        | pore-filling cement                                                                           | pore cement (bulk rock powder) | calcite                         |           |
| 2275-5   | conglomerate                    | 0.708933                        | pore-filling cements, small veins, and clast rims; 1 large carbonate-cemented sandstone clast | pore cement (microdrill)       | mostly Mg-calcite, 1 dolomite   | 13.9-50.3 |
| 2275-6   | sandstone                       | 0.709853                        | pore-filling cement                                                                           | pore cement (bulk rock powder) | calcite                         | 1.3-2.3   |
| 2276-3   | layered sandstone               | 0.710442                        | pore-filling cement                                                                           | pore cement (bulk rock powder) | calcite                         |           |

|         |                                             |          |                                                                |                                                            |                                      |              |
|---------|---------------------------------------------|----------|----------------------------------------------------------------|------------------------------------------------------------|--------------------------------------|--------------|
| 2276-4  | sandstone                                   | 0.710673 | pore-filling<br>cement                                         | pore cement<br>(bulk rock<br>powder)                       | calcite                              | 1.7-<br>2.3  |
| 2278-3  | sandstone with<br>veins                     | 0.709748 | pore-filling<br>cement,<br>sandy veins                         | pore cement<br>(microdrill)                                | Mg-calcite                           | 7.6-<br>10.8 |
| 2280-3  | sandstone                                   | 0.712794 | pore-filling<br>cement,<br>minor detrital<br>grains            | pore cement<br>and grains<br>(bulk rock<br>powder)         | calcite,<br>dolomite                 |              |
| 2281-1c | fossiliferous<br>sandy concretion           | 0.711351 | patchy pore-<br>filling<br>cement, large<br>shell<br>fragments | pore cement<br>(microdrill)                                | calcite                              |              |
| 2281-4  | sandstone with<br>mudstone rip-up<br>clasts | 0.711803 | pore-filling<br>cement, grain<br>coatings                      | pore cement,<br>grain<br>coatings<br>(bulk rock<br>powder) | mostly Mg-<br>calcite, 1<br>dolomite | 7.4-<br>46.4 |

## CARBONATE-BEARING ROCKS FROM THE VERTICAL FAULT ZONE

| method     | percent<br>diagenetic<br>carbonate | major detrital mineralogy                                                                                      | general description                                                                                                                                                                                                                                                                                                                             |
|------------|------------------------------------|----------------------------------------------------------------------------------------------------------------|-------------------------------------------------------------------------------------------------------------------------------------------------------------------------------------------------------------------------------------------------------------------------------------------------------------------------------------------------|
| XRD        | 33                                 | quartz, plagioclase, amphibole, mica; minor chert and volcanic rock fragments                                  | siltstone layers: discontinuous, up to 5 mm thick, show internal alignment of platy minerals, offset by small faults; detrital grains subangular to subrounded and unaltered; cement fills pores in sandy and silty layers as patches of small crystals with sugary texture, generally nonluminescent; pores otherwise filled with silty matrix |
| microprobe | 81                                 | altered volcanic and metamorphic rock fragments up to 2 cm in diameter; minor sandstone clasts                 | clasts subrounded to rounded; carbonate cement in sandstone clast predates conglomerate cement; matrix is mixture of detrital silt and pore-filling microcrystalline carbonate cement; also small carbonate veins and rims to grains with coarser carbonate; slight orange luminescence to veins and rims, pore cement nonluminescent           |
| microprobe | 28                                 | quartz, plagioclase, mica, amphibole; minor pyroxene, metamorphic rock fragments, sulfides, and organic matter | grains angular to subrounded; good alignment of elongate minerals; alteration of some plagioclase, sulfides; pores completely filled with coarsely crystalline homogeneous carbonate cement that shows uniform dull orange luminescence                                                                                                         |
| XRD        | 35                                 | quartz, plagioclase, amphibole, mica; minor metamorphic rock fragments                                         | grains subangular to subrounded; mostly unaltered, one plagioclase altered to carbonate; carbonate cement is dark, fine-grained, pore filling, very abundant                                                                                                                                                                                    |

|            |             |                                                                                                 |                                                                                                                                                                                                                                                                                                                                                                                                                   |
|------------|-------------|-------------------------------------------------------------------------------------------------|-------------------------------------------------------------------------------------------------------------------------------------------------------------------------------------------------------------------------------------------------------------------------------------------------------------------------------------------------------------------------------------------------------------------|
| microprobe | 22          | quartz, plagioclase, amphibole, mica; minor volcanic rock fragments, sulfides, organic matter   | grains subangular to subrounded; scattered broken quartz and feldspar grains with carbonate cemented fractures, kinked mica; minor alteration of plagioclase, pervasive alteration of sulfides, volcanic fragments; pores uniformly filled with coarsely crystalline carbonate cement that luminesces bright orange                                                                                               |
| microprobe | 21 in pores | quartz, plagioclase; minor amphibole, volcanic rock fragments, mica, pyroxene                   | grains subangular to subrounded; volcanic rock fragments altered; pervasive fine-grained, dark, pore-filling carbonate cement; undeformed sandstone cut by sandy veins up to 5 mm wide with dark, very fine-grained carbonate cement                                                                                                                                                                              |
| XRD        | 9           | quartz, plagioclase, volcanic rock fragments, altered opaques; minor amphibole, mica, carbonate | grains subangular to subrounded; opaques and volcanic fragments altered; diagenetic carbonate in small patches of pore-filling cement                                                                                                                                                                                                                                                                             |
| XRD        | 65          | quartz, plagioclase; minor volcanic rock fragments                                              | predominantly carbonate cement and large mollusc shell fragments, with minor subangular to rounded sand grains; cement has patchy light and dark appearance largely due to changes from coarse to fine crystal size, respectively; locally, coarse cement appears to fill vugs; shells show no luminescence; cement shows orange luminescence, brightest around vugs(?), suggesting slight increase in Mn content |
| microprobe | 57          | quartz, plagioclase, amphibole, mica                                                            | grains subangular to subrounded, silt to sand-sized; thin layer of large mudstone clasts; carbonate fills pores and one vug, coarsely crystalline, homogeneous; carbonate luminesces dull orange except at grain rims, which luminesce bright orange                                                                                                                                                              |
